# Supplementary material for: Identification of AMPK activator from twelve pure compounds isolated from Aralia Taibaiensis: implication in antihyperglycemic and hypolipidemic activities
Source: PubMed Central journal article supplement — Korean J Physiol Pharmacol. 2017 Apr 21;21(3):279–86. doi: 10.4196/kjpp.2017.21.3.279 (PMC5409114; doi:10.4196/kjpp.2017.21.3.279), 2017-04-21
Supplement: kjpp-21-279-s001.pdf [file kjpp-21-279-s001.pdf]

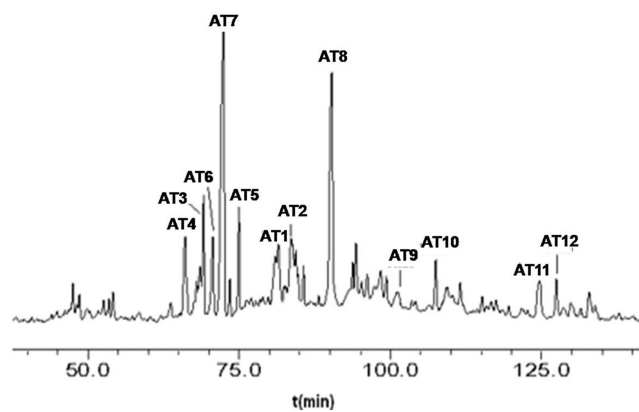

**Supplementary Figure 1. HPLC analysis of the root bark extract of *Aralia Taibaiensis*.** HPLC analysis was performed on a Zorbax SB-C<sub>18</sub> column (250 mm×4.6 mm, 5 μm) and kept at 30°C. The mobile phase consisted of 0.02 M (pH 3.5) potassium dihydrogen phosphate and acetonitrile (35:65, v/v). The flow rate was 1.0 ml/min and the chromatogram was monitored at 206 nm [4].
