# Supplementary material for: Identification of AMPK activator from twelve pure compounds isolated from Aralia Taibaiensis: implication in antihyperglycemic and hypolipidemic activities
Source: PubMed Central journal article supplement — Korean J Physiol Pharmacol. 2017 Apr 21;21(3):279–86. doi: 10.4196/kjpp.2017.21.3.279 (PMC5409114; doi:10.4196/kjpp.2017.21.3.279), 2017-04-21
Supplement: kjpp-21-279-s002.pdf [file kjpp-21-279-s002.pdf]

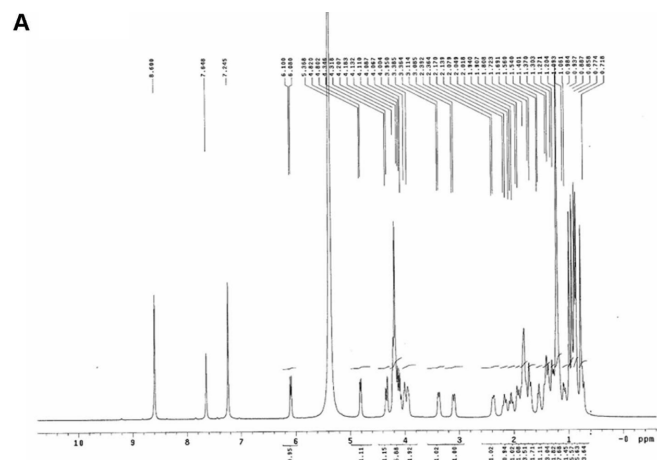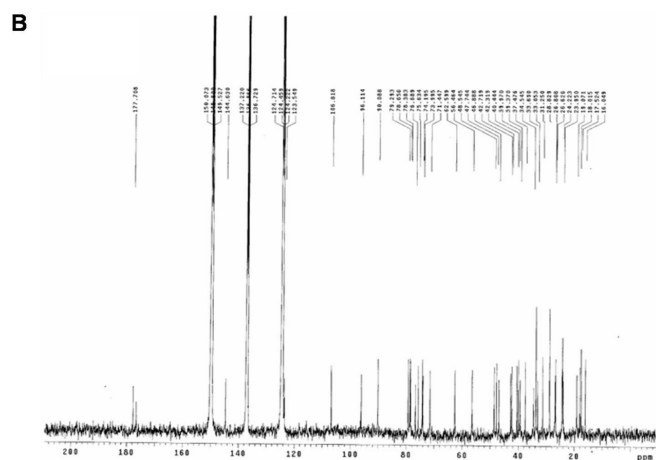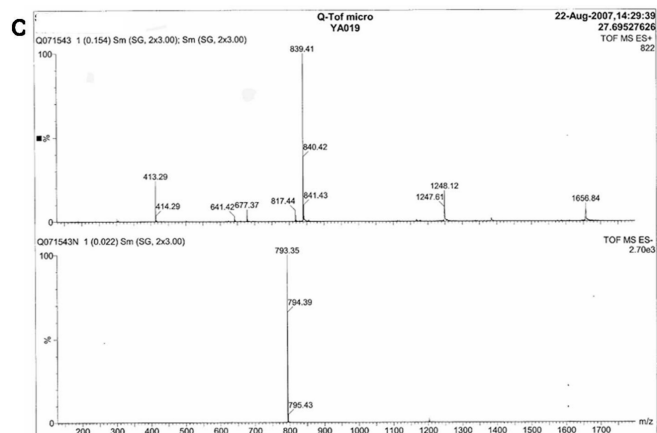

**Supplementary Figure 2.**  $^1\text{H-NMR}$ ,  $^{13}\text{C-NMR}$  and ESI-MS spectra of AT12. The structure of AT12 was elucidated as  $\text{C}_{42}\text{H}_{66}\text{O}_{14}$  by spectral analysis. These spectral data ( $^1\text{H-NMR}$ ,  $^{13}\text{C-NMR}$  and ESI-MS) here are represented for AT12.
